# Supplementary material for: Potential role of ochratoxin A in Parkinson’s disease: a systematic review of current evidence
Source: Springer Nature journal article supplement (doi:10.1007/s00204-025-03994-5), 2025-03-06
Supplement: MOESM1 [file 204_2025_3994_MOESM1_ESM.pdf]

**Supplementary Table 1** Data extraction of reviewed articles assessing **KE2: mitochondrial dysfunction by *in vitro* techniques**.

| <b>KE2: mitochondrial dysfunction</b>                                                    |                                                   |                                                                                                    |                                                                                                                                                                                                                                               |                        |
|------------------------------------------------------------------------------------------|---------------------------------------------------|----------------------------------------------------------------------------------------------------|-----------------------------------------------------------------------------------------------------------------------------------------------------------------------------------------------------------------------------------------------|------------------------|
| <b>Cell line</b>                                                                         | <b>[OTA]/Exposure time</b>                        | <b>Assay</b>                                                                                       | <b>Result</b>                                                                                                                                                                                                                                 | <b>Reference</b>       |
| <i>Intracellular ROS direct analysis</i>                                                 |                                                   |                                                                                                    |                                                                                                                                                                                                                                               |                        |
| Human neuroblastoma (SK-N-MC)                                                            | 12.38, 24.76 and 49.53 $\mu\text{M}$ / 24, 48 h   | DCFH-DA staining assay                                                                             | Dose-dependent increase of ROS at both times                                                                                                                                                                                                  | Baldi et al., 2004     |
| Human neuroblastoma (SH-SH5Y)<br>Mouse neural cells (HT22)                               | 100 $\mu\text{M}$ / 30 min – 1 h                  | DCFH-DA staining assay                                                                             | Increase of ROS in both cell lines at both times                                                                                                                                                                                              | Yoon et al., 2009      |
| Mouse neural cells (Neuro-2a)                                                            | 100, 250 and 500 nM / 24 h                        | DCFH-DA staining assay                                                                             | Significant dose-dependent increase of ROS                                                                                                                                                                                                    | Bhat et al., 2016      |
| Human neuroblastoma (SH-SH5Y)<br>Mouse neural cells (HT22)                               | 10 $\mu\text{M}$ / 30 min – 6 h                   | Dihydroethidium (DHE) staining assay                                                               | SH-SY5Y: significant increase of ROS after 30 min, which remained unchanged during 6h<br>HT22: significant increase of ROS after 30 min, which gradually decreased during 6h                                                                  | Babayan et al., 2020   |
| Retinal ganglion cells (RGC-5)                                                           | 248 and 496 nM / 3 days                           | ROS detection kit (Jiancheng, Nanjing, China)                                                      | Significant dose-dependent increase of ROS                                                                                                                                                                                                    | Fu et al., 2024        |
| Gibco® Human Astrocyte (GHA)                                                             | 5-15 $\mu\text{M}$ / 24 h                         | DCFH-DA staining assay                                                                             | Significant dose-dependent increase of ROS                                                                                                                                                                                                    | Chu et al., 2024       |
| <i>Intracellular ROS indirect analysis</i>                                               |                                                   |                                                                                                    |                                                                                                                                                                                                                                               |                        |
| Human neuroblastoma (SH-SH5Y)<br>Mouse neural cells (HT22)                               | 10 $\mu\text{M}$ / 30 min – 72 h                  | Fpg-comet assay                                                                                    | SH-SY5Y: maximal level of Fpg-sensitive sites detected after 1 h OTA treatment, and significantly decreased after 72 h<br>HT22: maximal level of Fpg-sensitive sites detected after 1 h OTA treatment, and significantly decreased after 24 h | Babayan et al., 2020   |
| <i>Quantification of lipid peroxidation</i>                                              |                                                   |                                                                                                    |                                                                                                                                                                                                                                               |                        |
| Primary rat neurons and astrocytes                                                       | 10, 20, 25, 50, 75, 100, 150 $\mu\text{M}$ / 46 h | MDA detection                                                                                      | Dose-dependent MDA increase in both cell lines                                                                                                                                                                                                | Belmadani et al., 1999 |
| Mouse neural cells (Neuro-2a)                                                            | 100, 250 and 500 nM / 24 h                        | MDA detection                                                                                      | Significant MDA increase at 250 and 500 nM OTA                                                                                                                                                                                                | Bhat et al., 2016      |
| Retinal ganglion cells (RGC-5)                                                           | 248 and 496 nM / 3 days                           | MDA detection                                                                                      | Significant dose-dependent increase of MDA                                                                                                                                                                                                    | Fu et al., 2024        |
| <i>Measurement of the cellular GSH status</i>                                            |                                                   |                                                                                                    |                                                                                                                                                                                                                                               |                        |
| Retinal ganglion cells (RGC-5)                                                           | 248 and 496 nM / 3 days                           | GST content assay (Jiancheng, Nanjing, China)                                                      | Dose-dependent decrease of GST levels                                                                                                                                                                                                         | Fu et al., 2024        |
| Gibco® Human Astrocyte (GHA)                                                             | 5-15 $\mu\text{M}$ / 24 h                         | CMFDA staining assay                                                                               | GSH levels were significantly reduced in a dose-dependent manner                                                                                                                                                                              | Chu et al., 2024       |
| <i>Detection of superoxide production</i>                                                |                                                   |                                                                                                    |                                                                                                                                                                                                                                               |                        |
| Retinal ganglion cells (RGC-5)                                                           | 248 and 496 nM / 3 days                           | SOD detection kit (Jiancheng, Nanjing, China)                                                      | SOD levels were significantly decreased at both concentrations                                                                                                                                                                                | Fu et al., 2024        |
| <i>Measurement of Mitochondrial Membrane Potential (<math>\Delta\Psi\text{m}</math>)</i> |                                                   |                                                                                                    |                                                                                                                                                                                                                                               |                        |
| Retinal ganglion cells (RGC-5)                                                           | 248 and 496 nM / 3 days                           | JC-1 staining                                                                                      | Significant loss of $\Delta\Psi\text{m}$ in OTA-exposed cells                                                                                                                                                                                 | Fu et al., 2024        |
| Human neuroblastoma (SH-SH5Y)<br>Primary rat neurons                                     | 0.1, 0.25, 1.0 and 2.5 $\mu\text{M}$ / 8 h        | JC-1 staining                                                                                      | Dose-dependent loss of $\Delta\Psi\text{m}$ in both cell lines                                                                                                                                                                                | Zhang et al., 2009     |
| Mouse neural cells (Neuro-2a)                                                            | 100, 250 and 500 nM / 24 h                        | Rhodamine 123 staining                                                                             | Dose-dependent loss of $\Delta\Psi\text{m}$                                                                                                                                                                                                   | Bhat et al., 2016      |
| Normal Human Astrocytes (NHA-SV40LT)                                                     | 0.5, 1 and 2 $\mu\text{M}$ / 48 h                 | JC-1 staining                                                                                      | Significant loss of $\Delta\Psi\text{m}$ at 2 $\mu\text{M}$ OTA                                                                                                                                                                               | Park et al., 2019      |
| <i>Mitochondrial permeability transition pore opening (MPTPo) evaluation</i>             |                                                   |                                                                                                    |                                                                                                                                                                                                                                               |                        |
| Normal Human Astrocytes (NHA-SV40LT)                                                     | 0.5, 1 and 2 $\mu\text{M}$ / 48 h                 | Fluo-4 staining (cytosolic $\text{Ca}^{++}$ ) and Rho-2 staining (mitochondrial $\text{Ca}^{++}$ ) | Slight increase in the number of intracellular $\text{Ca}^{++}$ ions<br>Significant increase of mitochondrial $\text{Ca}^{++}$ at 2 $\mu\text{M}$ OTA                                                                                         | Park et al., 2019      |

CMFDA: 5-chloromethyl fluorescein diacetate; DCFH-DA: dichlorofluorescein diacetate; DHE: dihydroethidium; GST: glutathione-S-transferase; GSH: glutathione; MDA: malondialdehyde; MPTPo: mitochondrial permeability transition pore opening; OTA: Ochratoxin A; ROS: Reactive Oxygen Species; SOD: superoxide; [OTA]: Ochratoxin A concentration;  $\Delta\Psi\text{m}$ : mitochondrial membrane potential.

**Supplementary Table 2** Data extraction of reviewed articles assessing **KE3: impaired proteostasis by *in vitro* techniques**.

| KE3: impaired proteostasis              |                       |                                       |                                                                                                                                                                             |                           |
|-----------------------------------------|-----------------------|---------------------------------------|-----------------------------------------------------------------------------------------------------------------------------------------------------------------------------|---------------------------|
| Cell line                               | [OTA]/Exposure time   | Assay                                 | Result                                                                                                                                                                      | Reference                 |
| General turnover assays                 |                       |                                       |                                                                                                                                                                             |                           |
| WT $\alpha$ -syn SH-SH5Y                | 100 nM / 72 h         | Standard cycloheximide procedure (WB) | OTA treatment significantly increased $\alpha$ -syn half-life (by 26%)                                                                                                      | Izco <i>et al.</i> , 2021 |
|                                         | 100 and 200 nM / 72 h | WB and RT-qPCR                        | 100 and 200 nM OTA significantly decrease LAMP-2A protein levels, while mRNA expression was downregulated only by 200 nM OTA. No changes in hsc70 expression were observed. |                           |
| Monitory of autophagy-related molecules |                       |                                       |                                                                                                                                                                             |                           |
| WT $\alpha$ -syn SH-SH5Y                | 100 and 200 nM / 72 h | WB and RT-qPCR                        | 100 and 200 nM OTA significantly decrease LAMP-2A protein levels, while mRNA expression was downregulated only by 200 nM OTA. No changes in hsc70 expression were observed. | Izco <i>et al.</i> , 2021 |

Hsc70: heat shock cognate protein 70; LAMP-2A: lysosome-associated membrane protein 2A; OTA: Ochratoxin A; RT-qPCR: quantitative Reverse Transcription Polymerase Chain Reaction; WB: Western Blot;  $\alpha$ -syn: alpha synuclein; [OTA]: Ochratoxin A concentration.

**Supplementary Table 3** Data extraction of reviewed articles assessing **KE5: neuroinflammation by *in vitro* techniques**.

| KE5: neuroinflammation                |                                  |                                                                                                                                                                    |                                                                                                                                                                                                                                                      |                                     |
|---------------------------------------|----------------------------------|--------------------------------------------------------------------------------------------------------------------------------------------------------------------|------------------------------------------------------------------------------------------------------------------------------------------------------------------------------------------------------------------------------------------------------|-------------------------------------|
| Cell line                             | [OTA]/Exposure time              | Assay                                                                                                                                                              | Result                                                                                                                                                                                                                                               | Reference                           |
| Detection of astrocyte markers        |                                  |                                                                                                                                                                    |                                                                                                                                                                                                                                                      |                                     |
| Primary rat astrocytes                | 10 and 20 nM / 24, 48 h          | RT-qPCR and biotinylation techniques                                                                                                                               | GFAP: OTA reduced GFAP mRNA expression at 24 h and 48 h. GFAP staining was significantly diminished by OTA at 48 h.<br>Vimentin: dose-dependent increase of vimentin mRNA levels at 24 h and 48 h, while its intensity staining presented no change. | Zurich <i>et al.</i> , 2005         |
| Primary rat astrocytes                | 10 μM / 72 h                     | ELISA assay                                                                                                                                                        | No significant effect over GFAP and GLT-1 total expression                                                                                                                                                                                           | Razafimanjato <i>et al.</i> , 2010  |
|                                       |                                  | Biotinylation techniques                                                                                                                                           | 50% decrease in the cell surface expression of GFAP and GLT-1                                                                                                                                                                                        |                                     |
| Detection of astrocyte markers        |                                  |                                                                                                                                                                    |                                                                                                                                                                                                                                                      |                                     |
| Primary rat astrocytes                | 10 nM / 48 h                     | Detection of GFAP and MTI/MTII: RT-qPCR and biotinylation techniques                                                                                               | Significant decrease of MTI/MTII expression after 48 h of exposure and a decrease of GFAP mRNA levels after 24 h of exposure.                                                                                                                        | von Tobel <i>et al.</i> , 2014      |
| Detection of microglial activation    |                                  |                                                                                                                                                                    |                                                                                                                                                                                                                                                      |                                     |
| Oligodendrocytes and microglial cells | 10 nM / 48 h and 10 days         | Immunolabelling technique                                                                                                                                          | Significant increase of IB4 positive cells after 10 days                                                                                                                                                                                             | von Tobel <i>et al.</i> , 2014      |
|                                       |                                  | Quantification of cytokines expression (IL-4, IL-6, IL-1β, TNF-α), M1 and M2 microglial phenotype (Itgam/Cd11b and Cd86/B7-2; Arg1 and Mrc1/Cd206) through RT-qPCR | Increased expression of pro-inflammatory cytokines and decreased levels of anti-inflammatory cytokines after 10 days<br>Rise of Itgam and Cd86 levels and upregulated Mrc1 expression at both timepoints.                                            |                                     |
| Glutamine synthetase (GS) assay       |                                  |                                                                                                                                                                    |                                                                                                                                                                                                                                                      |                                     |
| Primary rat astrocytes                | 10 and 20 nM / 24, 48 h          | Quantification of GS mRNA levels through RT-qPCR. Measurement of GS activity through a colourimetric method                                                        | 20 nM OTA significantly decreased GS mRNA levels and GS activity 48 h post-treatment                                                                                                                                                                 | Zurich <i>et al.</i> , 2005         |
| Glutamine synthetase (GS) assay       |                                  |                                                                                                                                                                    |                                                                                                                                                                                                                                                      |                                     |
| Primary rat astrocytes                | 1, 10 and 100 μM / 72 h          | Measurement of GS activity through a colourimetric method                                                                                                          | 100 μM OTA significantly inhibited GS activity                                                                                                                                                                                                       | Razafimanjato <i>et al.</i> , 2010  |
| BV-2 cells                            | 50-2,000 nM / 24 h               | Quantification of cytokines expression (iNOS, IL-1β, IL-6, TNF-α) through RT-qPCR; measurement of IL-6 by ELISA; determination of NO production by Griess reagent  | A dose-dependent upregulation of IL-6, TNF-α, IL-1β, and iNOS mRNA levels was observed after 24 h OTA exposure; as well as extracellular IL-6 and NO levels.                                                                                         | Chansawhang <i>et al.</i> , 2022    |
| Human neuroblastoma (SH-SH5Y)         | 3.1, 6.25, 12.5 μM 24 h and 48 h | ELISA assay                                                                                                                                                        | IL-6 and TNF-α expressions were slightly increased after 24 h OTA exposure and significantly increased after 48 h in all three doses.                                                                                                                | Penalva-Olcina <i>et al.</i> , 2024 |

Arg1: arginase 1; Cd86/B7-2: cluster of differentiation 86; GFAP: glial fibrillary acidic protein; GLT-1: glial glutamate transporter type 1; GS: glutamine synthetase; IL: interleukin; IB4: isolectin B4; iNOS: inducible nitric oxide synthase; Itgam/Cd11b: integrin alpha M; Mrc1/Cd206: mannose receptor C type 1; MTI/II: melatonin receptor type 1 and 2; NO: nitric oxide; OTA: ochratoxin A; RT-qPCR: quantitative reverse transcription polymerase chain reaction; TNF: tumour necrosis factor; [OTA]: ochratoxin A concentration.

**Supplementary Table 4** Data extraction of reviewed articles assessing **KE2: mitochondrial dysfunction by *in vivo* techniques**.

| KE2: mitochondrial dysfunction                 |                             |                                                                        |                                                             |                                                                                                                                                                         |                      |
|------------------------------------------------|-----------------------------|------------------------------------------------------------------------|-------------------------------------------------------------|-------------------------------------------------------------------------------------------------------------------------------------------------------------------------|----------------------|
| Experimental system                            | OTA dose                    | Route/Administration period                                            | Assay                                                       | Result                                                                                                                                                                  | Reference            |
| Intracellular ROS indirect analysis            |                             |                                                                        |                                                             |                                                                                                                                                                         |                      |
| Male Swiss ICR mice                            | 0–6 mg/kg b.w.              | i.p. single-dose<br>Observation 6, 24 and 72 h<br>after administration | Standard comet assay                                        | Oxidative DNA damage was increased across all brain regions at all time points, having its peak at 24 h, after administration 3.5 mg OTA/kg b.w.                        | Sava et al., 2006a   |
|                                                |                             |                                                                        | Detection of OGG1 activity                                  | Inhibition of OGG1 activity in all brain regions, having a peak at 6 h.                                                                                                 |                      |
| Quantification of lipid peroxidation           |                             |                                                                        |                                                             |                                                                                                                                                                         |                      |
| Male Swiss ICR mice                            | 0–6 mg/kg b.w.              | i.p. single-dose<br>Observation 6, 24 and 72 h<br>after administration | Measurement of TBARS levels                                 | MDA levels increased in a time-dependent manner in all brain regions, after administration of single-dose 3.5 mg OTA/kg b.w.                                            | Sava et al., 2006a   |
| Male Balb/C albino mice                        | 3.5 mg/kg b.w.              | i.p./ 3 days                                                           | Measurement of TBARS levels                                 | MDA levels were significantly increased in brain tissue.                                                                                                                | Bhat et al., 2018    |
| Female albino Wistar rats                      | 10 mg/kg b.w.               | p.o. / 28 days                                                         | MDA detection                                               | MDA levels were significantly increased (50%) in brain tissue.                                                                                                          | Nogaim et al., 2020  |
| WT zebrafish ( <i>Danio rerio</i> ) both sexes | 1.38, 2.77, 5.53 mg/kg b.w. | i.p. / 96 h; 96 + 24 h                                                 | Measurement of TBARS levels                                 | No changes were observed in TBARS levels after OTA administration compared to controls.                                                                                 | Valadas et al., 2023 |
| Measurement of the cellular GSH status         |                             |                                                                        |                                                             |                                                                                                                                                                         |                      |
| Male Balb/C albino mice                        | 3.5 mg/kg b.w.              | i.p. / 3 days                                                          | ABTS cation radical decolourisation assay (Re et al., 1999) | GSH status was significantly reduced after OTA administration.                                                                                                          | Bhat et al., 2018    |
| Female albino Wistar rats                      | 10 mg/kg b.w.               | p.o. / 28 days                                                         | GSH content assay (Jollow, 1974)                            | GSH levels were significantly reduced (27%) in brain tissue.                                                                                                            | Nogaim et al., 2020  |
| Detection of superoxide production             |                             |                                                                        |                                                             |                                                                                                                                                                         |                      |
| Male Swiss ICR mice                            | 0–6 mg/kg b.w.              | i.p. single-dose<br>Observation 6, 24 and 72 h<br>after administration | SOD assay (Elstner and Heupel, 1976)                        | Upregulation of SOD activity in all brain regions (33%), reaching a peak after 24 h and returning to control levels after 72 h, after administration 3.5 mg OTA/kg b.w. | Sava et al., 2006a   |
| Male Balb/C albino mice                        | 3.5 mg/kg b.w.              | i.p. / 3 days                                                          | SOD assay kit (Ransod)                                      | SOD levels were significantly decreased in OTA-treated group compared to control groups.                                                                                | Bhat et al., 2018    |
| Female albino Wistar rats                      | 10 mg/kg b.w.               | p.o. / 28 days                                                         | SOD assay (Marklund & Marklund, 1974)                       | SOD activity was significantly decreased in brain tissue (33%) after OTA treatment.                                                                                     | Nogaim et al., 2020  |

b.w.: body weight; GSH: glutathione; i.p.: intraperitoneal; MDA: malonaldehyde; OGG1: oxyguanosine glycosylase; OTA: Ochratoxin A; p.o.: per os; ROS: Reactive Oxygen Species; SOD: superoxide dismutase; TBARS: thiobarbituric acid reactive substances.

**Supplementary Table 5** Data extraction of reviewed articles assessing **KE3: impaired proteostasis by *in vivo* techniques**

| <b>KE3: impaired proteostasis</b>                |                      |                                                                               |              |                                                                                                                                                            |                   |
|--------------------------------------------------|----------------------|-------------------------------------------------------------------------------|--------------|------------------------------------------------------------------------------------------------------------------------------------------------------------|-------------------|
| Experimental system                              | OTA dose             | Route/Administration period                                                   | Assay        | Result                                                                                                                                                     | Reference         |
| <i>Monitoring of autophagy-related molecules</i> |                      |                                                                               |              |                                                                                                                                                            |                   |
| Male Balb/C albino mice                          | 0.21, 0-5 mg/kg b.w. | p.o. by gavage / 28 days<br>Observation once a month<br>during six months AET | WB technique | Dose-dependent decrease in LAMP-2A (20% at 0.21 mg/kg b.w. and 50% at 0.5 mg/kg b.w.) in midbrain, while no changes were observed in hsc70 protein levels. | Izco et al., 2021 |

AET: after the end of the treatment; b.w.: body weight; hsc70: heat shock cognate protein 70; LAMP-2A: lysosome-associated membrane protein 2A; OTA: Ochratoxin A; p.o.: per os; WB: Western Blot

**Supplementary Table 6** Data extraction of reviewed articles assessing **KE4: degeneration of dopaminergic neurons of the nigrostriatal pathway by *in vivo* techniques**

| <b>KE4: degeneration of dopaminergic neurons of the nigrostriatal pathway</b> |                                        |                                                                                                      |                                                         |                                                                                                                                                                                                                                                            |                    |
|-------------------------------------------------------------------------------|----------------------------------------|------------------------------------------------------------------------------------------------------|---------------------------------------------------------|------------------------------------------------------------------------------------------------------------------------------------------------------------------------------------------------------------------------------------------------------------|--------------------|
| Experimental system                                                           | OTA dose                               | Route/Administration period                                                                          | Assay                                                   | Result                                                                                                                                                                                                                                                     | Reference          |
| <i>Dopaminergic neurons in the striatum/SNpc</i>                              |                                        |                                                                                                      |                                                         |                                                                                                                                                                                                                                                            |                    |
| Male Balb/C albino mice                                                       | 0.21, 0-5 mg/kg b.w.                   | p.o by gavage / 28 days<br>Observation once a month during six months AET                            | Immunohistochemistry (detection of TH-positive neurons) | A significant decrease of TH staining (loss of DA innervation) in the anterior and posterior striatum with both doses. A significant decrease (26%) in the number of TH+ DA neurons was observed in the midbrain after 0.21 mg OTA/kg b.w. administration. | Izco et al., 2021  |
| <i>Dopamine content in the striatum/SNpc</i>                                  |                                        |                                                                                                      |                                                         |                                                                                                                                                                                                                                                            |                    |
| Male Swiss ICR mice                                                           | 0–6 mg/kg b.w.                         | i.p. single-dose /<br>Tissue sample 24 h after administration                                        | HPLC                                                    | Dose-dependent decrease of DA striatal content (50%). ED50 of 3.2 mg/kg b.w.                                                                                                                                                                               | Sava et al., 2006a |
| Male Swiss ICR mice                                                           | 4, 8, 16 mg/kg b.w. (cumulative doses) | Subcutaneous continuous infusion (Alzet osotic minipumps) / 2 weeks                                  | HPLC                                                    | A DA decline of 24% was observed in caudate/putamen, after 2 cumulative dose of 8 mg/kg b.w.                                                                                                                                                               | Sava et al., 2006b |
| Male Balb/C albino mice                                                       | 3.5 mg/kg b.w.                         | i.p. / 3 days                                                                                        | RPHPLC                                                  | DA content decrease in hippocampus, striatum and whole brain tissue compared to control.                                                                                                                                                                   | Bhat et al., 2018  |
| <i>Detection of Lewy Bodies (<math>\alpha</math>-syn)</i>                     |                                        |                                                                                                      |                                                         |                                                                                                                                                                                                                                                            |                    |
| Male Balb/C albino mice                                                       | 0.21, 0-5 mg/kg b.w.                   | p.o by gavage / 28 days<br>Observation once a month during six months after the end of OTA treatment | Immunohistochemistry                                    | p-syn aggregates in SNpc were detected (0.21 mg OTA/kg b.w.: 1.5 aggregates/section; 0.5 mg OTA/kg b.w.: 2.5 aggregates/section).                                                                                                                          | Izco et al., 2021  |

$\alpha$ -syn: alpha synuclein; AET: after the end of the treatment; b.w.: body weight; DA: dopaminergic/dopamine; HPLC: High Performance Liquid Chromatography; i.p.: intraperitoneal; OTA: Ochratoxin A; p-syn: phosphorylated alpha-synuclein; p.o.: per os; RPHPLC: reverse-phase HPLC; SNpc: substantia nigra pars compacta; TH: tyrosine hydroxylase.

**Supplementary Table 7** Data extraction of reviewed articles assessing **KE5: neuroinflammation by *in vivo* techniques**

| <b>KE5: neuroinflammation</b>         |                |                                                                                                               |                                       |                                                                                                              |                    |
|---------------------------------------|----------------|---------------------------------------------------------------------------------------------------------------|---------------------------------------|--------------------------------------------------------------------------------------------------------------|--------------------|
| Experimental system                   | OTA dose       | Route/Administration period                                                                                   | Assay                                 | Result                                                                                                       | Reference          |
| <i>Detection of astrocyte markers</i> |                |                                                                                                               |                                       |                                                                                                              |                    |
| Male C57BL/6 mice                     | 3.5 mg/kg b.w. | i.p. /1, 2, 3 or 6 doses, each dose separated by 3 days. Mice sacrificed 3 days after the last administration | Immunohistochemistry (GFAP detection) | A significant dose-dependent decrease in GFAP cell expression was observed (60% after six cumulative doses). | Mateo et al., 2022 |

b.w.: body weight; GFAP: Glial Fibrillary Acidic Protein; i.p.: intraperitoneal; OTA: Ochratoxin A.

**Supplementary Table 8** Data extraction of reviewed articles assessing the **adverse outcome: parkinsonian motor deficits by *in vivo* techniques.**

| <b>Adverse Outcome: parkinsonian motor deficits</b> |                                                       |                                     |                                                                                |                                                                                                                                                                                                                                                                                                                                                                                                                                                                                                                                                                                                                                                                                                                                                                                                                                                                                                                                                                                                                                                                   |                       |
|-----------------------------------------------------|-------------------------------------------------------|-------------------------------------|--------------------------------------------------------------------------------|-------------------------------------------------------------------------------------------------------------------------------------------------------------------------------------------------------------------------------------------------------------------------------------------------------------------------------------------------------------------------------------------------------------------------------------------------------------------------------------------------------------------------------------------------------------------------------------------------------------------------------------------------------------------------------------------------------------------------------------------------------------------------------------------------------------------------------------------------------------------------------------------------------------------------------------------------------------------------------------------------------------------------------------------------------------------|-----------------------|
| Experimental system                                 | OTA dose                                              | Route/Administration period         | Assay                                                                          | Result                                                                                                                                                                                                                                                                                                                                                                                                                                                                                                                                                                                                                                                                                                                                                                                                                                                                                                                                                                                                                                                            | Reference             |
| <i>Behavioural tests</i>                            |                                                       |                                     |                                                                                |                                                                                                                                                                                                                                                                                                                                                                                                                                                                                                                                                                                                                                                                                                                                                                                                                                                                                                                                                                                                                                                                   |                       |
| Adult sea bass, D. lab- rax L.                      | 0.05, 0.1, 0.15, 0.2, 0.25, 0.3, 0.35, 0.4 mg/kg b.w. | p.o. (diet; feed) / 24, 48, 72, 96h | Assessment of behavioural and swimming patters                                 | The following behavioural changes after OTA administration were observed: sluggish movement, loss of equilibrium, rapid operculum movement as respiratory manifestations. Before death, muscular seizures occurred.                                                                                                                                                                                                                                                                                                                                                                                                                                                                                                                                                                                                                                                                                                                                                                                                                                               | El-Sayed et al., 2009 |
| Male Balb/C albino mice                             | 3.5 mg/kg b.w.                                        | i.p. / 3 days                       | Gait analysis, spontaneous activity adhesive removal, parallel bars, pole test | <u>Gait analysis</u> : OTA treatment reduced the mean stride length measurements of forelimb and hindlimb on both 7 <sup>th</sup> and 14 <sup>th</sup> day of treatment.<br><u>Spontaneous activity</u> : forelimb and hindlimb steps, as well as the results of rears in cylinder and grooming time for OTA treated groups showed a lower activity on the 14 <sup>th</sup> day compared to the 7 <sup>th</sup> day.<br><u>Adhesive removal</u> : time taken for making contact and removing the stimulus was significantly longer for the OTA-treated groups compared to the control, even more so on the 14 <sup>th</sup> day than the 7 <sup>th</sup> day.<br><u>Parallel bars</u> : mice treated with OTA took significantly longer to orient themselves and to walk to one end of the pole on the 14 <sup>th</sup> day compared to the 7 <sup>th</sup> day, showing a decrease in motor coordination.<br><u>Pole test</u> : extrapyramidal motor dexterity was significantly affected after OTA treatment on both 7 <sup>th</sup> and 14 <sup>th</sup> days. | Bhat et al., 2018     |

Supplementary Table 8 (Continued).

| Adverse Outcome: parkinsonian motor deficits |                             |                                                                                                |                                         |                                                                                                                                                                                                                                                                                                                                                                                   |                              |
|----------------------------------------------|-----------------------------|------------------------------------------------------------------------------------------------|-----------------------------------------|-----------------------------------------------------------------------------------------------------------------------------------------------------------------------------------------------------------------------------------------------------------------------------------------------------------------------------------------------------------------------------------|------------------------------|
| Experimental system                          | OTA dose                    | Route/Administration period                                                                    | Assay                                   | Result                                                                                                                                                                                                                                                                                                                                                                            | Reference                    |
| <i>Behavioural tests</i>                     |                             |                                                                                                |                                         |                                                                                                                                                                                                                                                                                                                                                                                   |                              |
| Male Balb/C albino mice                      | 0.21, 0.5 mg/kg b.w.        | p.o. by gavage / 28 days<br>Observation once a month six months after the end of OTA treatment | Wire hang test, negative geotaxis       | A significant decrease in motor performance was detected by the <u>wire hang test</u> and the <u>negative geotaxis test</u> in OTA-treated mice, 31 weeks after the end of the treatment.                                                                                                                                                                                         | Izco <i>et al.</i> , 2021    |
| WT zebrafish (Danio rerio) both sexes        | 1.38, 2.77, 5.53 mg/kg b.w. | i.p. / 96h; 96 + 24h                                                                           | Open tank test, social interaction test | <u>Open tank test</u> : a significant decrease in distance, absolute turn angle and mean speed was observed with the 1.38 mg/kg dose, as well as an increase in freezing time, indicating locomotor impairment.<br><u>Social interaction test</u> : OTA tested doses caused no altered social behaviour in any of the analysed parameters (distance, crossings, and interaction). | Valadas <i>et al.</i> , 2023 |

b.w.: body weight; i.p.: intraperitoneal; OTA: Ochratoxin A; p.o.: *per os*.

Supplementary Table 9 Data extraction of reviewed articles non-related to any key event of the Adverse Outcome Pathway (AOP).

| Non-related to AOP KE articles |                             |                                                                             |                                                                                                                                                                                                                                                                               |                                                                                                                                                                                                                                                             |                                     |
|--------------------------------|-----------------------------|-----------------------------------------------------------------------------|-------------------------------------------------------------------------------------------------------------------------------------------------------------------------------------------------------------------------------------------------------------------------------|-------------------------------------------------------------------------------------------------------------------------------------------------------------------------------------------------------------------------------------------------------------|-------------------------------------|
| Experimental system            | OTA dose                    | Route/Administration period                                                 | Assay                                                                                                                                                                                                                                                                         | Result                                                                                                                                                                                                                                                      | Reference                           |
| Female albino Fischer rats     | 0.120 mg/kg b.w.            | Gastric intubation / Rats sacrificed after 10, 20 and 35 days of treatment  | Determination of Ecto-Ca <sup>2+</sup> /Mg <sup>2+</sup> ATPase and ecto-5'Nucleotidase activity (Culić <i>et al.</i> , 1990), alanine aminopeptidase activity (Jung & Scholz, 1980), γ-glutamyl transferase activity (Szasz, 1969) and N-acetyl-β-D-glucosaminidase activity | Increased activity of membrane-bound enzymes (Ecto-Ca <sup>2+</sup> /Mg <sup>2+</sup> ATPase, alanine aminopeptidase, ecto-5'Nucleotidase and γ-glutamyl transferase) and even a larger increase in lactate dehydrogenase and N-acetyl-β-D-glucosaminidase) | Zanic-Grubisic <i>et al.</i> , 1996 |
| Male albino Wistar rats        | 0.289 mg/kg b.w.            | Gastric intubation / 6 weeks, dose every 48h                                | HPLC                                                                                                                                                                                                                                                                          | Tyrosine and phenylalanine levels were increased in general brain.                                                                                                                                                                                          | Belmadani <i>et al.</i> , 1998 (a)  |
|                                |                             |                                                                             | Histological analyses                                                                                                                                                                                                                                                         | Increased number of pyknotic cells in the hippocampus.                                                                                                                                                                                                      |                                     |
| Male albino Wistar rats        | 403 ng/10 μL                | Stereotaxic injection / 15 min<br>Rats sacrificed 24 h after administration | HPLC                                                                                                                                                                                                                                                                          | General decrease in free amino acids levels (i.e. tyrosine) increase in the levels of phenylalanine.                                                                                                                                                        | Belmadani <i>et al.</i> , 1998 (b)  |
|                                | 0.289 mg/kg b.w.            | p.o. by gavage / 8 days<br>Rats sacrificed 24 h after last administration   | Determination of LDH activity (Merk kit 3399) and DNase1 activity (Kunitz, 1950)                                                                                                                                                                                              | LDH increased in mesencephalon but unaltered in the rest of the brain. DNase was increased in mesencephalon and in the rest of the brain.                                                                                                                   |                                     |
|                                |                             |                                                                             | Determination of LDH activity (Merk kit 3399) and DNase1 activity (Kunitz, 1950)                                                                                                                                                                                              | LDH was increased in striatum, hippocampus, mesencephalon, and cerebellum, while DNase was increased in mesencephalon and cerebellum.                                                                                                                       |                                     |
| Female SPF Wag/mbi rats        | 0.07, 0.34, 1.68 mg/kg b.w. | p.o. by gavage / 26-28 days                                                 | Histological analyses                                                                                                                                                                                                                                                         | Dose-dependent increase in white-matter vacuolation.                                                                                                                                                                                                        | Dortant <i>et al.</i> , 2001        |
| Male Wistar rats               | 0.289 mg/kg b.w.            | p.o. (water) / 4 weeks                                                      | WB techniques                                                                                                                                                                                                                                                                 | Decreased protein expression of NMDAR subunits 2A and 2B in hippocampus.                                                                                                                                                                                    | Delibas <i>et al.</i> , 2003        |
| Male F344 (Fischer) rats       | 5 ppm                       | p.o. (diet; feed) / 35 and 51 weeks                                         | Histological analyses                                                                                                                                                                                                                                                         | Presence of large eosinophilic bodies in the brainstem, although thought to be artifacts.                                                                                                                                                                   | Mantle and Nolan, 2010              |

b.w.: body weight; HPLC: High Performance Liquid Chromatography; i.p.: intraperitoneal; LDH: lactate dehydrogenase; NMDAR: N-methyl-D-aspartate receptor; OTA: Ochratoxin A; p.o.: *per os*; ppm: parts per million.
